# Supplementary material for: Standard echocardiography versus handheld echocardiography for the detection of subclinical rheumatic heart disease: a systematic review and meta-analysis of diagnostic accuracy
Source: HighWire-hosted journal article supplement (doi:10.1136/bmjopen-2020-038449), 2020-10-01
Supplement: bmjopen-2020-038449supp002_data_supplement.pdf [file bmjopen-2020-038449supp002_data_supplement.pdf]

**Supplementary file 2.** Forest plots and Hierarchical Summary Receiver Operating Characteristic (HSROC) plots for three categorisations of RHD; any RHD (definite or borderline), definite RHD only and borderline RHD only.

\*All plots were generated using the Review Manager (RevMan) software package, version 5.3

**Any RHD:**

| Study          | TP  | FP  | FN | TN   | Expertise  | Sensitivity (95% CI) | Specificity (95% CI) | Sensitivity (95% CI) | Specificity (95% CI) |
|----------------|-----|-----|----|------|------------|----------------------|----------------------|----------------------|----------------------|
| Beaton (2014)  | 37  | 6   | 4  | 78   | Expert     | 0.90 [0.77, 0.97]    | 0.93 [0.85, 0.97]    |                      |                      |
| Beaton (2015)  | 141 | 158 | 39 | 1076 | Expert     | 0.78 [0.72, 0.84]    | 0.87 [0.85, 0.89]    |                      |                      |
| Beaton (2016)  | 44  | 50  | 9  | 286  | Non_expert | 0.83 [0.70, 0.92]    | 0.85 [0.81, 0.89]    |                      |                      |
| Mirabel (2015) | 41  | 106 | 8  | 1062 | Non_expert | 0.84 [0.70, 0.93]    | 0.91 [0.89, 0.93]    |                      |                      |
| Ploutz (2016)  | 32  | 194 | 11 | 719  | Non_expert | 0.74 [0.59, 0.86]    | 0.79 [0.76, 0.81]    |                      |                      |
| Zuhlke (2016)  | 21  | 0   | 5  | 62   | Expert     | 0.81 [0.61, 0.93]    | 1.00 [0.94, 1.00]    |                      |                      |

**Fig 1.** Forest plot of sensitivity and specificity of handheld echocardiography for any RHD

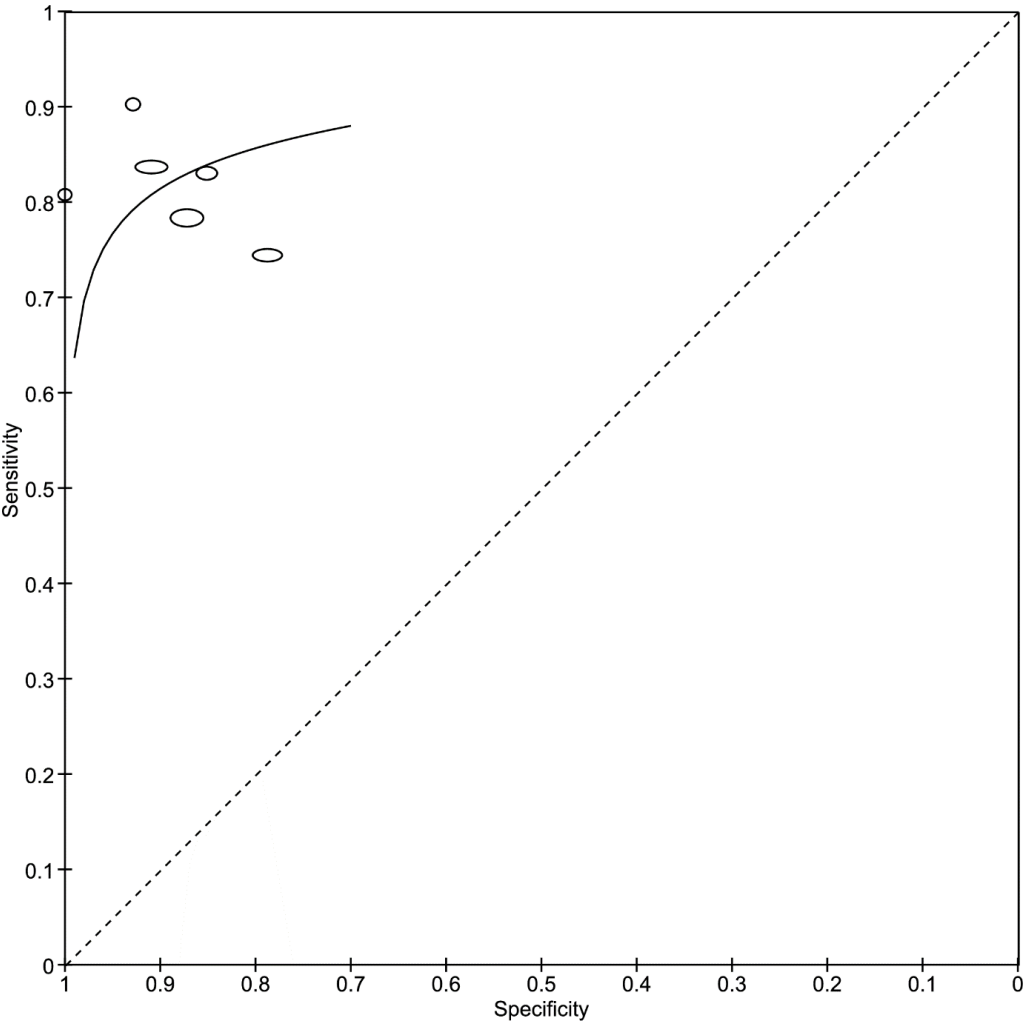

**Fig 2.** Summary ROC plot of sensitivity versus specificity of handheld echocardiography for any RHD

Definite RHD:

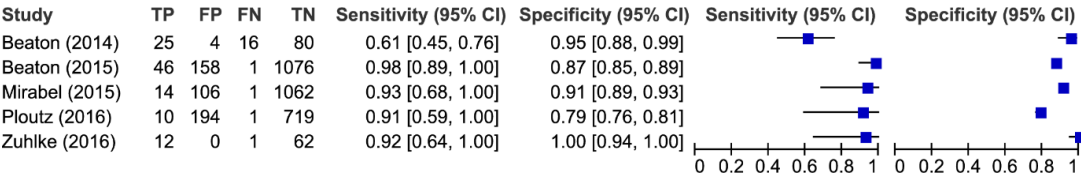

Fig 3. Forest plot of sensitivity and specificity of handheld echocardiography for definite RHD

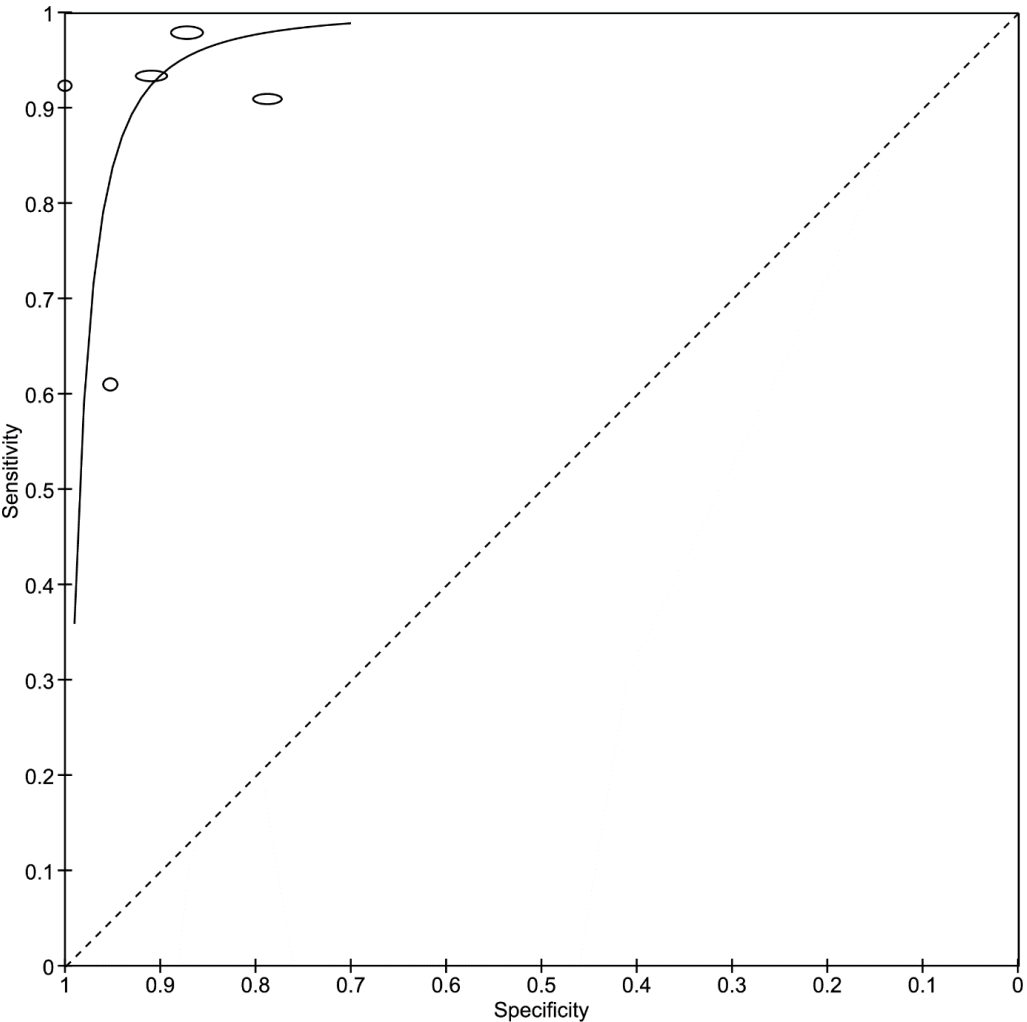

Fig 4. Summary ROC plot of sensitivity versus specificity of handheld echocardiography for definite RHD

Borderline RHD:

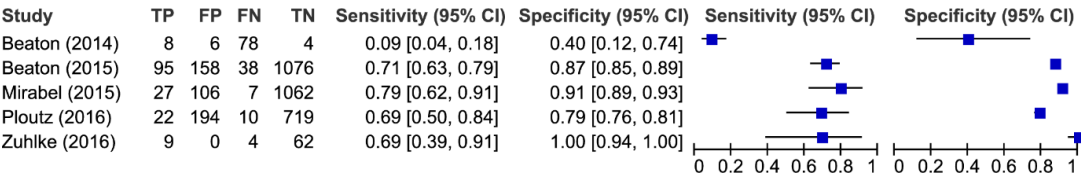

Fig 5. Forest plot of sensitivity and specificity of handheld echocardiography for borderline RHD

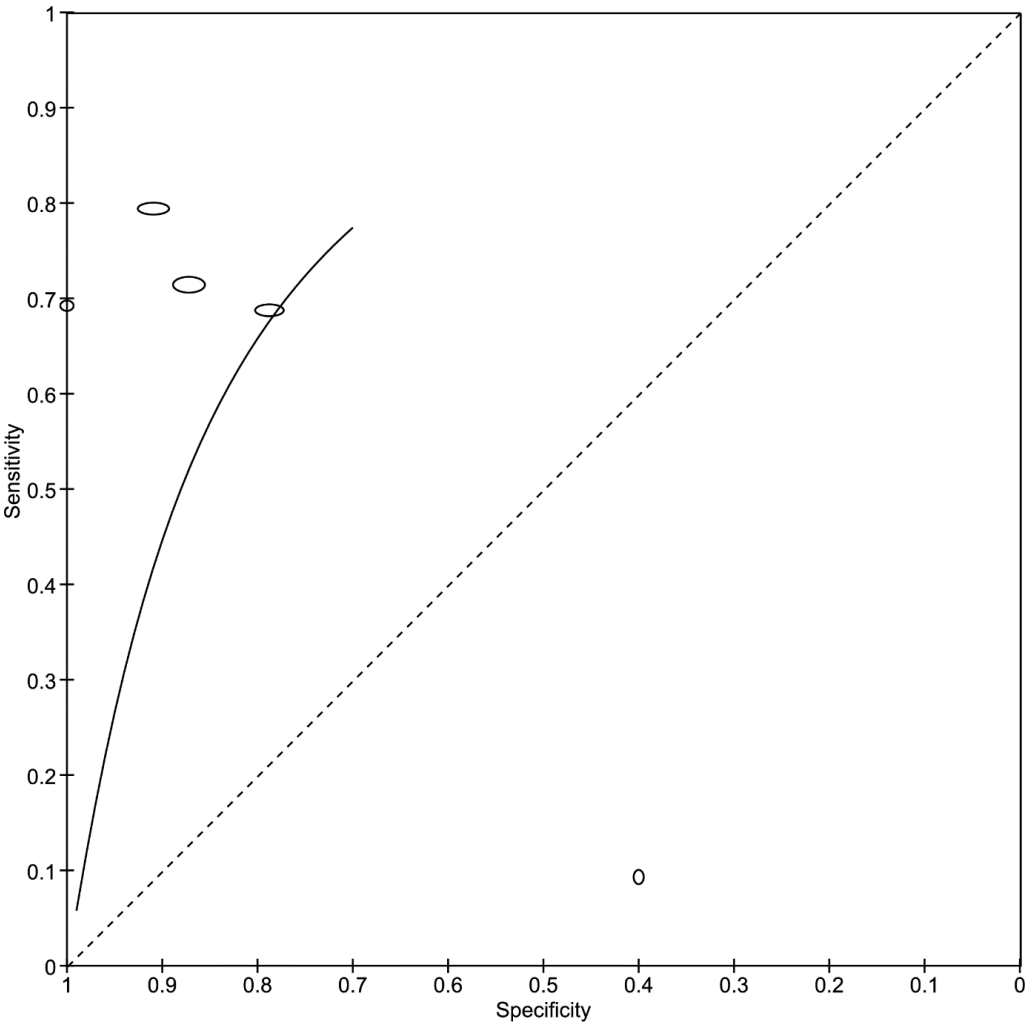

Fig 6. Summary ROC plot of sensitivity versus specificity of handheld echocardiography for borderline RHD
